# Supplementary material for: Tau activates microglia via the PQBP1-cGAS-STING pathway to promote brain inflammation
Source: PubMed Central journal article supplement (PMC8592984; doi:10.1038/s41467-021-26851-2), 2021-11-15
Supplement: 41467_2021_26851_MOESM1_ESM.pdf [file 41467_2021_26851_MOESM1_ESM.pdf]

## **Tau activates microglia via the PQBP1-cGAS-STING pathway to promote brain inflammation**

**Meihua Jin<sup>1,\$</sup>, Hiroki Shiwaku<sup>2,\$</sup>, Hikari Tanaka<sup>1,\$</sup>, Takayuki Obita<sup>3</sup>, Sakurako Ohuchi<sup>3</sup>, Yuki Yoshioka<sup>1</sup>, Xiaocen Jin<sup>1</sup>, Kanoh Kondo<sup>1</sup>, Kyota Fujita<sup>1</sup>, Hidenori Homma<sup>1</sup>, Kazuyuki Nakajima<sup>4</sup>, Mineyuki Mizuguchi<sup>3</sup> and Hitoshi Okazawa<sup>1,#</sup>**

<sup>1</sup>Department of Neuropathology, Medical Research Institute and Center for Brain Integration Research, Tokyo Medical and Dental University, 1-5-45 Yushima, Bunkyo-ku, Tokyo 113-8510, Japan.

<sup>2</sup>Department of Psychiatry, Graduate School of Medical and Dental Sciences, Tokyo Medical and Dental University, 1-5-45 Yushima, Bunkyo-ku, Tokyo 113-8510, Japan.

<sup>3</sup>Faculty of Pharmaceutical Sciences, Graduate School of Innovative Life Science, University of Toyama; 2630, Sugitani, Toyama 930-0194, Japan.

<sup>4</sup>Department of Bioinformatics, Institute of Bioinformatics, Soka university, 1-236 Tangi-machi, Hachioji, Tokyo 192-8577, Japan

\$ These authors contributed equally

# Corresponding author

[okazawa-tyk@umin.ac.jp](mailto:okazawa-tyk@umin.ac.jp)

## Supplementary Figure 1

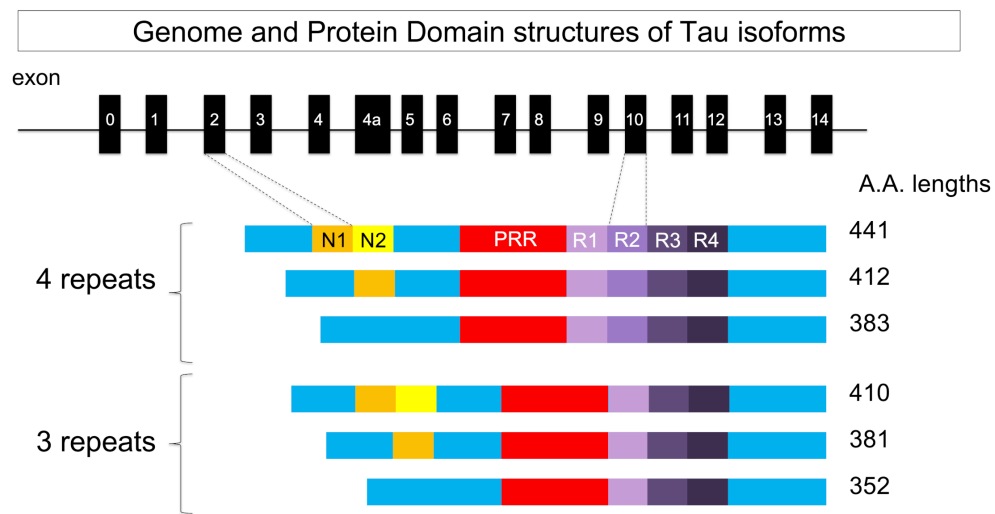

### Supplementary Figure 1

#### Genome and protein domain structures of Tau isoforms

N1/2, N-terminal domain; R1/2/3/4, C-terminal microtubule-binding domain (tau repeat domain); PRR, proline-rich region.

## Supplementary Figure 2

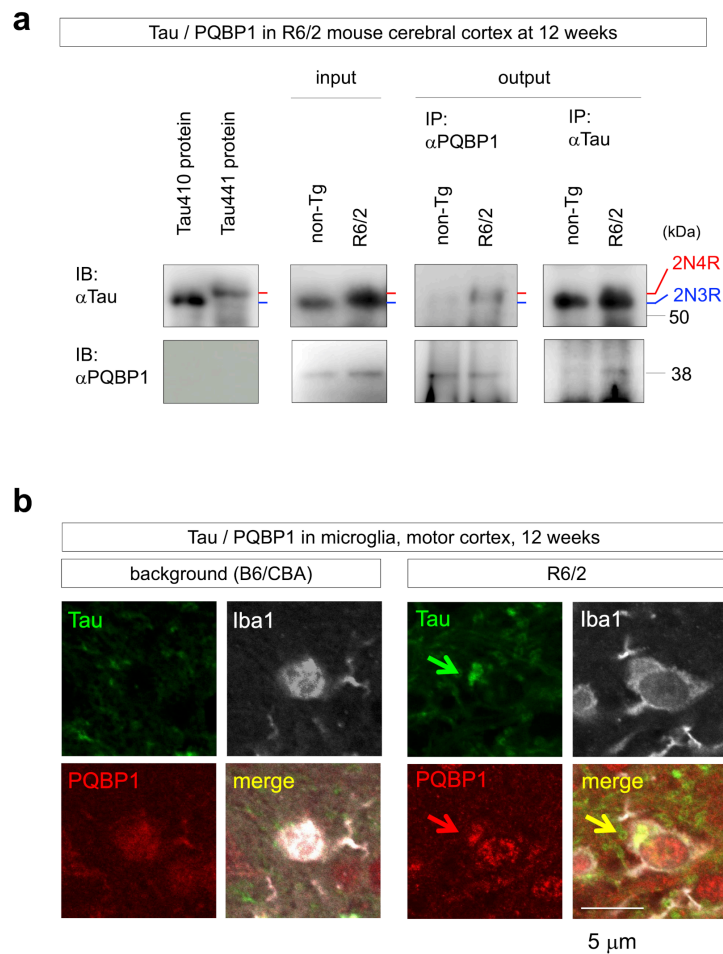

### Supplementary Figure 2

#### In vivo interaction between PQBP1 and Tau in R6/2 mice

a) Immunoprecipitation revealed interaction between PQBP1 and Tau in cerebral cortex tissues prepared from R6/2 Huntington's disease model mice. IB, immunoblot.

b) Immunohistochemistry revealed colocalization of PQBP1 and tau in brain microglia of R6/2 mice at the age of 12 weeks.

Results in (a) and (b) are representative of three independent repeat experiments.

## Supplementary Figure 3

### Full-length PQBP1 interaction with Tau, A $\beta$ and $\alpha$ -synuclein

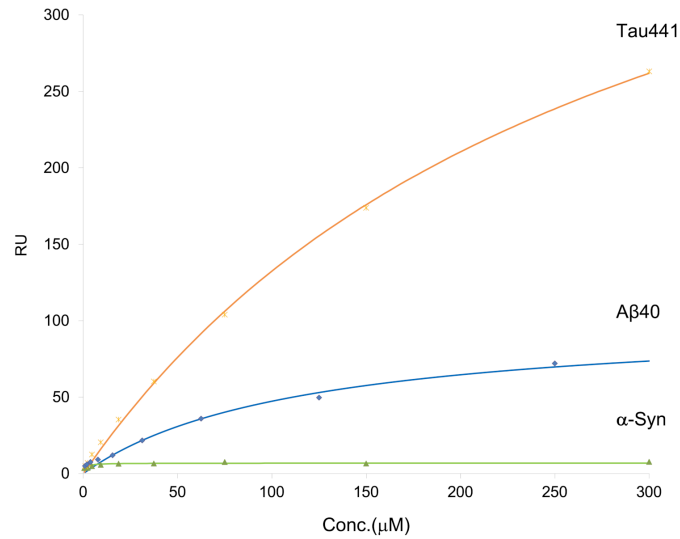

### Supplementary Figure 3

#### Comparison of binding properties of Tau, A $\beta$ and $\alpha$ -Synuclein to PQBP1

SPR analysis of interactions of full-length PQBP1 to the immobilized Tau 441 (red), A $\beta$  (blue), and  $\alpha$ -Synuclein (green). The binding response at equilibrium was plotted against the concentration of PQBP1. RU, resonance unit.

## Supplementary Figure 4

a

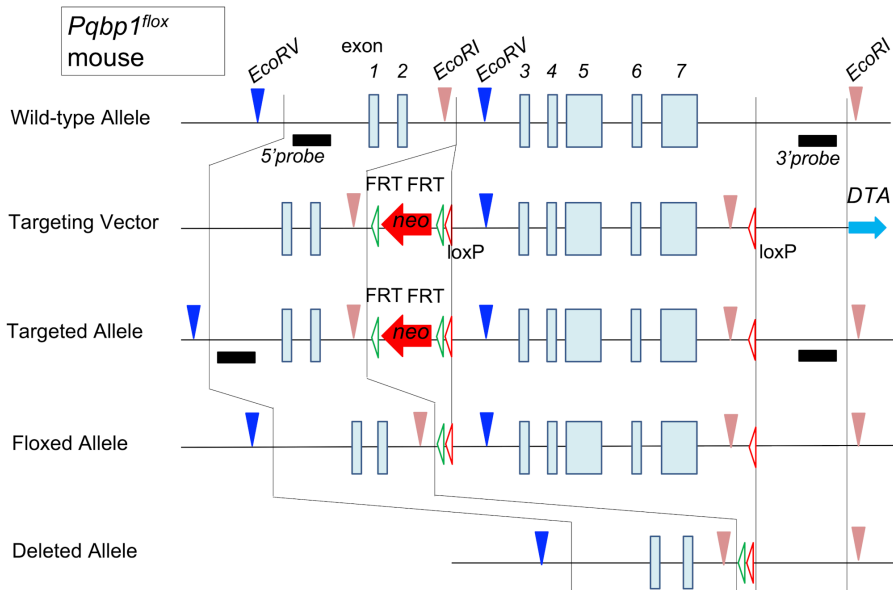

b

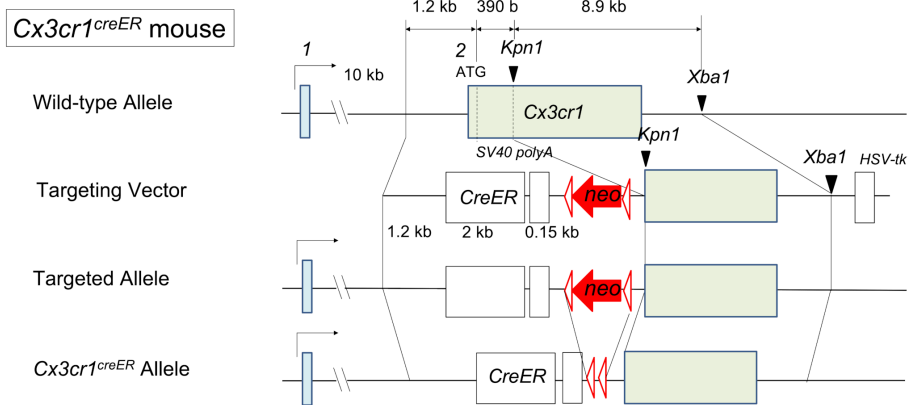

## Supplementary Figure 4

### Generation of tamoxifen-inducible and microglia-specific *Pqbp1*-cKO mouse

a) Generation method of *Pqbp1<sup>flox</sup>* mouse

FRT, flippase recognition target; DTA, diphtheria toxin A.

b) Generation method of *Cx3cr1<sup>creER</sup>* mouse

## Supplementary Figure 5

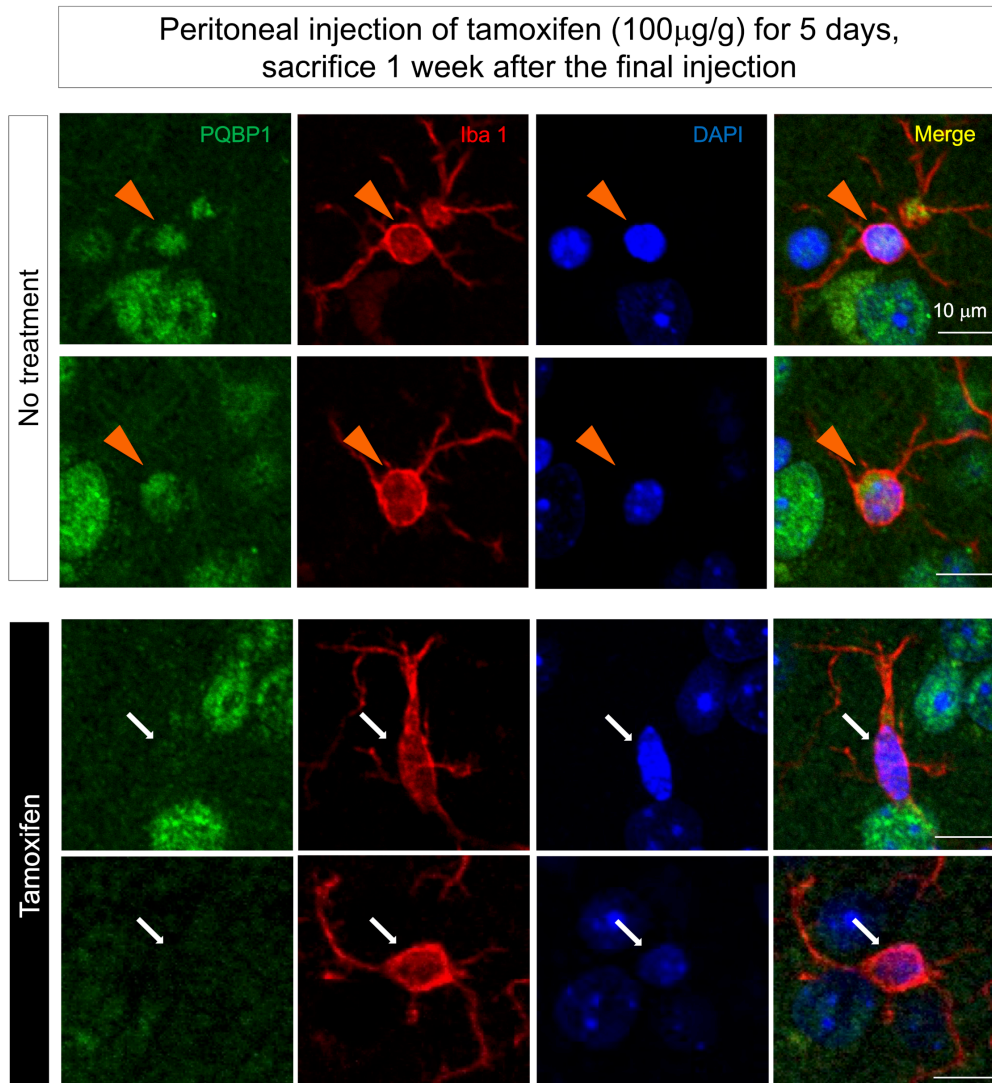

### Supplementary Figure 5

#### PQBP1 is depleted by tamoxifen treatment

*Pqbp1*-cKO mice received peritoneal injection of tamoxifen (100  $\mu$ g/g) for 5 days and were sacrificed 1 week after the final injection. Cerebral cortex tissues were stained with anti-PQBP1 and -Iba1 antibodies. Yellow arrowhead indicates microglia that express PQBP1 at high levels, while white arrow indicates microglia that express PQBP1 at low levels. The experiments were repeated independently three times with similar results.

## Supplementary Figure 6

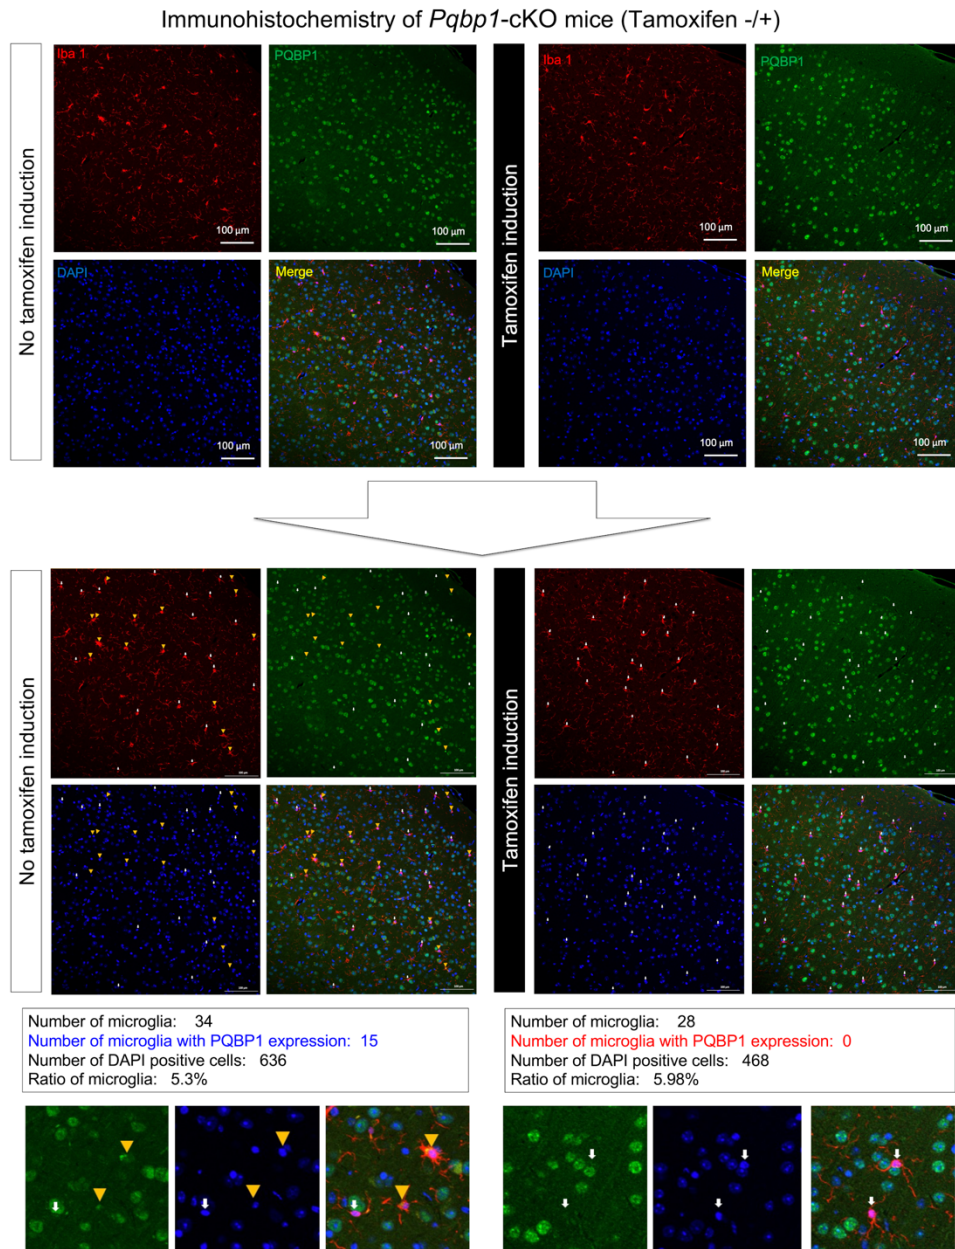

### Supplementary Figure 6

#### Quantitative analysis of PQBP1 depletion by tamoxifen treatment

Low magnification images of cerebral cortex tissues of tamoxifen-induced *Pqbp1*-cKO mice taken by confocal microscopy (upper panels). Microglia with a DAPI positive nucleus were examined for expression of PQBP1 protein (middle panels). Under high power magnification, high expressers (orange arrow heads) and low expressers (white arrows) of PQBP1 were observed in microglia of non-induced *Pqbp1*-cKO. In tamoxifen-induced *Pqbp1*-cKO mice, all microglia were low expressers.

## Supplementary Figure 7

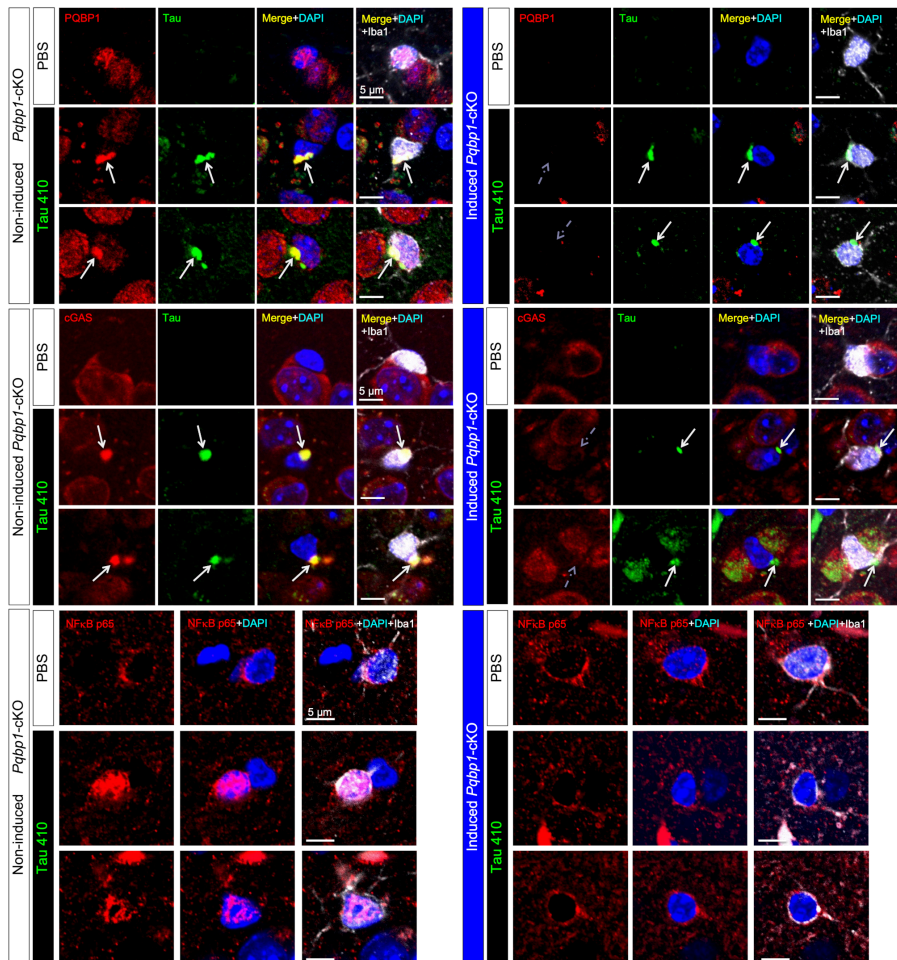

% nuclear NF- $\kappa$ B (+) microglia in Total microglia

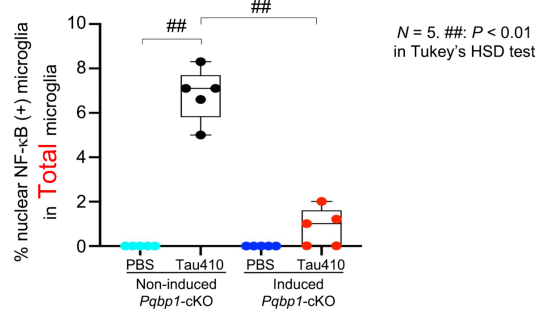

### Supplementary Figure 7

#### **PQBP1 is essential for in vivo activation of microglia by extrinsic Tau**

Immunohistochemistry of Iba1-positive microglia with PQBP1+tau, cGAS+tau or NF $\kappa$ B p65 co-staining in injected area of non-induced *Pqbp1*-cKO (left panels) or tamoxifen-induced *Pqbp1*-cKO (right panels). Quantitative analysis of activated microglia (nuclear NF $\kappa$ B-positive) among total Iba1-positive microglia is shown in the lower graph. In the absence of *Pqbp1*, microglia activation was suppressed.  $N = 5$  mice.  $P = 5.87e^{-10}$  (Tau 410 / non-induced vs PBS / non-induced),  $4.12e^{-9}$  (Tau 410 / non-induced vs Tau 410 / induced *Pqbp1*-cKO), ##:  $P < 0.01$  in Tukey's HSD test. Box plots show the median, quartiles, and whiskers that represent data outside the 25th to 75th percentile range.



## Supplementary Figure 8

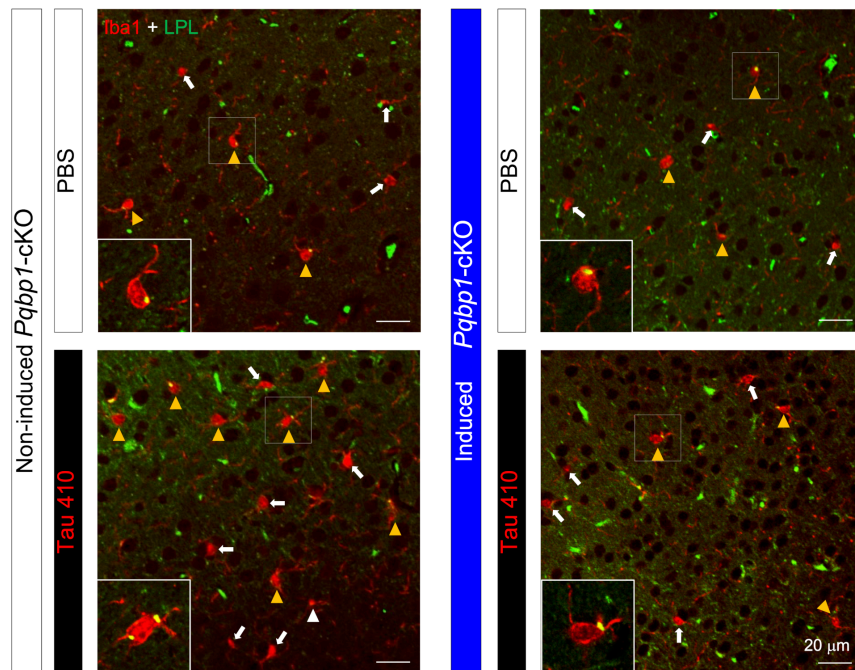

$N = 3$  mice, ##:  $P < 0.01$  in Tukey's HSD test

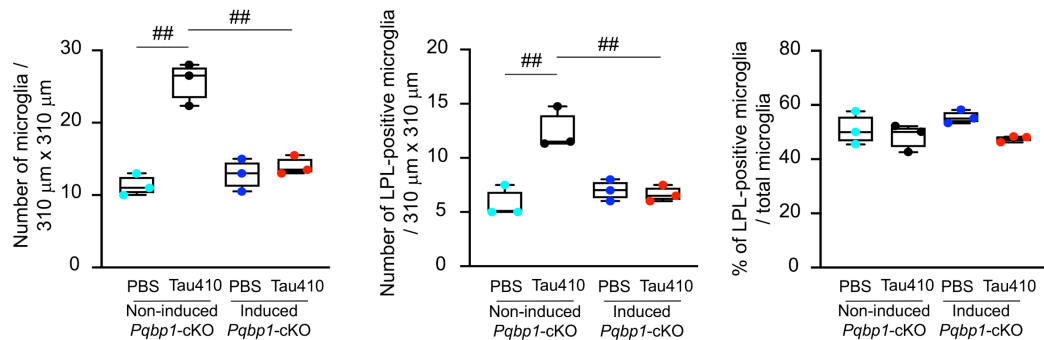

### Supplementary Figure 8

#### Induction of LPL-positive microglia by Tau

LPL immunostaining revealing an increase of LPL-positive microglia in non-induced *Pqbp1-cKO* mice after injection of Tau410, but not in tamoxifen-induced *Pqbp1-cKO* mice lacking PQBP1 in microglia. Lower graphs show total number of microglia, number of LPL-positive microglia, and percentage of LPL-positive microglia in four groups.  $N = 3$ . Microglia number:  $P = 0.0002$  (Tau 410 / non-induced vs PBS / non-induced),  $0.0007$  (Tau 410 / non-induced vs Tau 410 / induced *Pqbp1-cKO*). Number of LPL(+) microglia:  $P = 0.0014$  (Tau 410 / non-induced vs PBS / non-induced),  $0.0033$  (Tau 410 / non-induced vs Tau 410 / induced *Pqbp1-cKO*). % LPL(+) microglia in total microglia:  $P = 0.8538$  (Tau 410 / non-induced vs PBS / non-induced),  $0.9956$  (Tau 410 / non-induced vs Tau 410 / induced *Pqbp1-cKO*). ##:  $P < 0.01$  in Tukey's HSD test. Box plots show the median, quartiles, and whiskers that represent data outside the 25th to 75th percentile range.

# Supplementary Figure 9

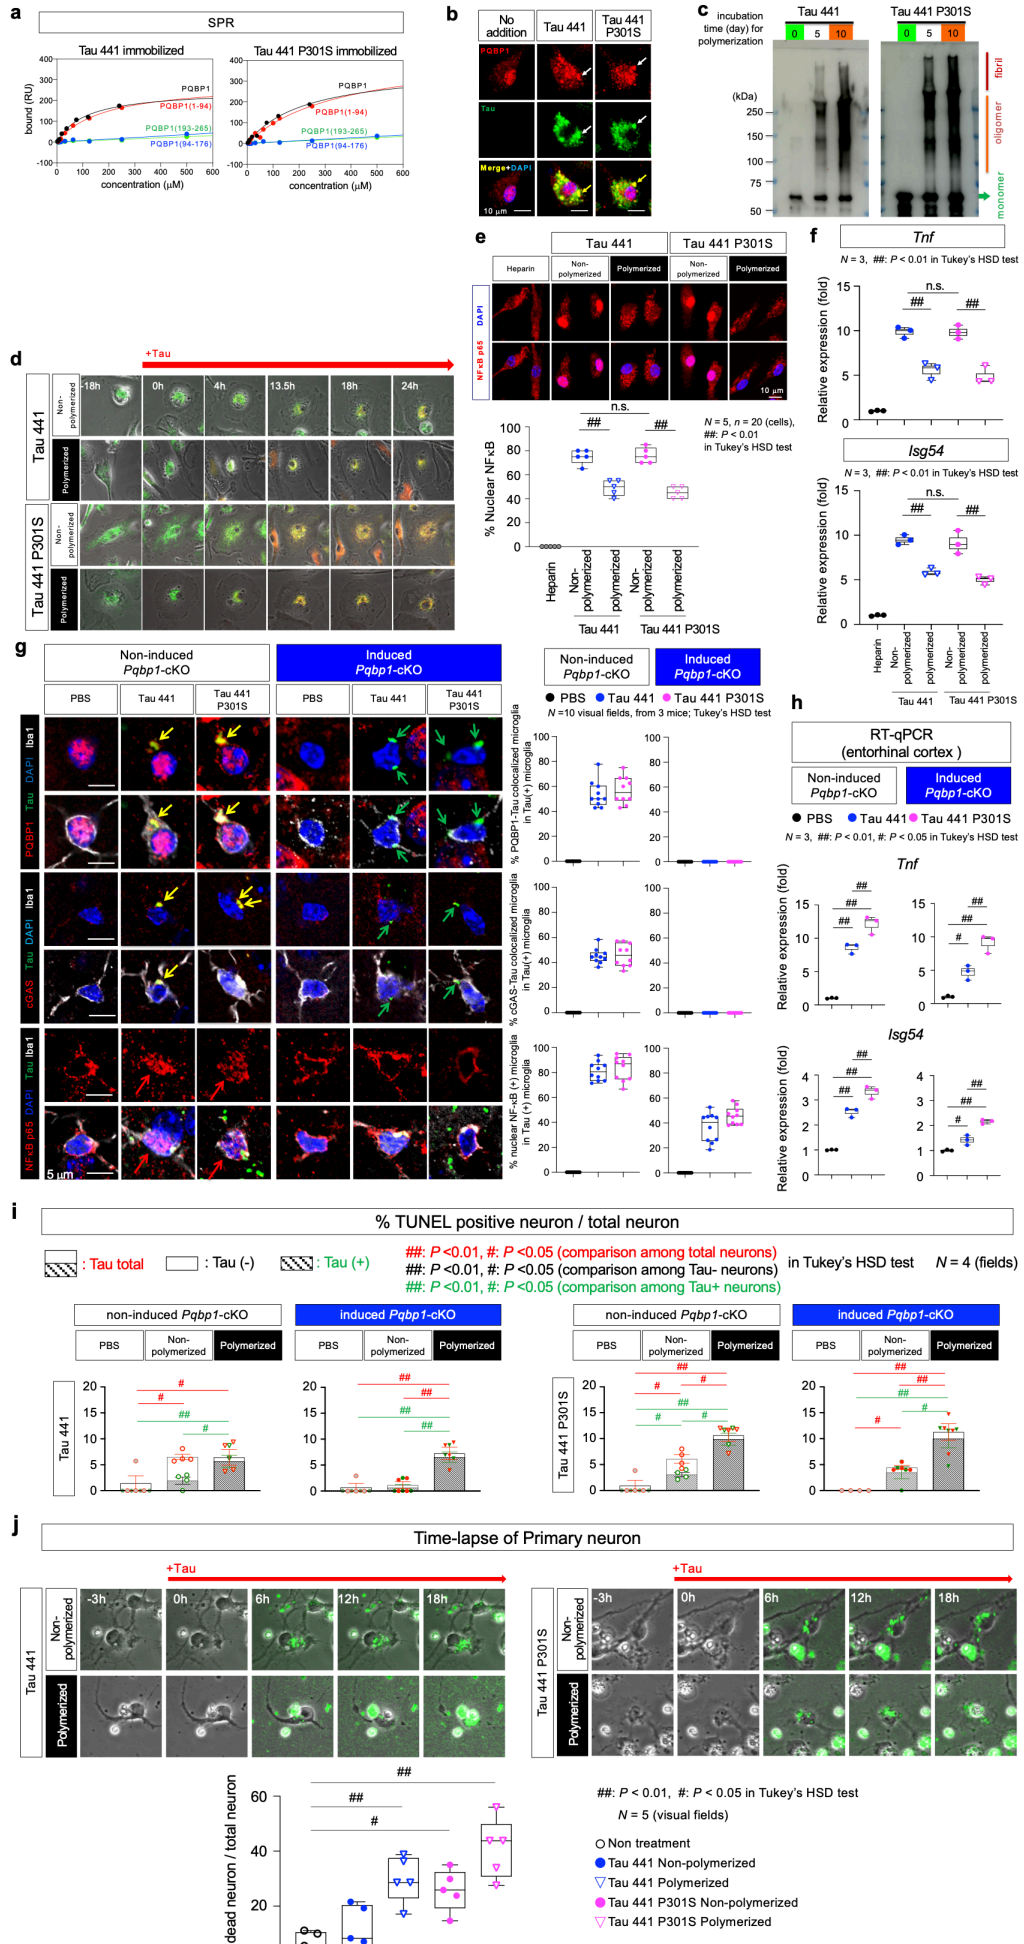

## Supplementary Figure 9

### Disease-linked mutation of Tau affects neurons but not microglia

- a) SPR analyses of Tau 441 and Tau 441 P301S.
  - b) Immunocytochemistry of Tau-incorporated microglia shows similar colocalization of PQBP1 and Tau 441 or Tau 441 P301S in cytoplasmic foci. The experiments were repeated four times with similar results.
  - c) Polymerization of Tau 441 and Tau 441 P301S by incubation at 37 °C. The experiments were repeated four times with similar results.
  - d) Time-lapse imaging of microglia after addition of Tau to the culture medium revealed similar dynamism of colocalization between PQBP1 and Tau 441 or Tau 441 P301S.
  - e) Similar induction of nuclear translocation of NF $\kappa$ B in microglia by Tau 441 and Tau 441 P301S.  $N = 5$ ,  $n = 20$  cells. ##:  $P < 0.01$  in Tukey's HSD test.
  - f) RT-qPCR revealed similar inductions of pro-inflammatory gene by addition of Tau 441 and Tau 441 P301S to primary microglia.  $N = 3$ . ##:  $P < 0.01$  in Tukey's HSD test.
  - g) Immunohistochemistry revealed similar colocalization of Tau 441 and Tau 441 P301S with PQBP1 (upper image panels) or cGAS (middle image panels) at cytoplasmic foci and similar induction of nuclear NF $\kappa$ B (lower image panels) in the presence of PQBP1 in microglia (non-induced *Pqbp1*-cKO), which were suppressed by PQBP1 depletion (induced *Pqbp1*-cKO). Right graphs show percentage of tau-PQBP1 colocalized (upper), Tau-cGAS (middle) colocalized or nuclear NF $\kappa$ B-positive (lower) Iba1-positive microglia among all Iba1- and Tau-positive microglia.  $N = 10$  visual fields from 3 mice. For statistical test, Tukey's HSD test was performed.
  - h) RT-qPCR based quantification of *Tnf* and *Isg54* mRNA in entorhinal cortex tissues of non-induced or induced *Pqbp1*-cKO mice after injection of PBS, Tau 441, or Tau 441 P301S.  $N = 3$ . #:  $P < 0.05$ , ##:  $P < 0.01$  in Tukey's HSD test.
  - i) TUNEL-positive and NeuN-positive neurons were counted in entorhinal cortex tissues of non-induced or induced *Pqbp1*-cKO mice after injection of PBS, Tau 441 or Tau 441 P301S in non-polymerized or polymerized state. Values in each group are presented as mean  $\pm$  SEM.  $N = 4$  visual fields. #:  $P < 0.05$ , ##:  $P < 0.01$  in Tukey's HSD test.
  - j) Neuronal death was observed by time-lapse imaging (upper images) and quantified (lower graph) in primary culture neurons after addition of Tau 441 or Tau 441 P301S in non-polymerized or polymerized state. H, hour.  $N = 5$  visual fields. #:  $P < 0.05$ , ##:  $P < 0.01$  in Tukey's HSD test.
- Box plots show the median, quartiles, and whiskers that represent data outside the 25th to 75th percentile range.

## Supplementary Figure 10

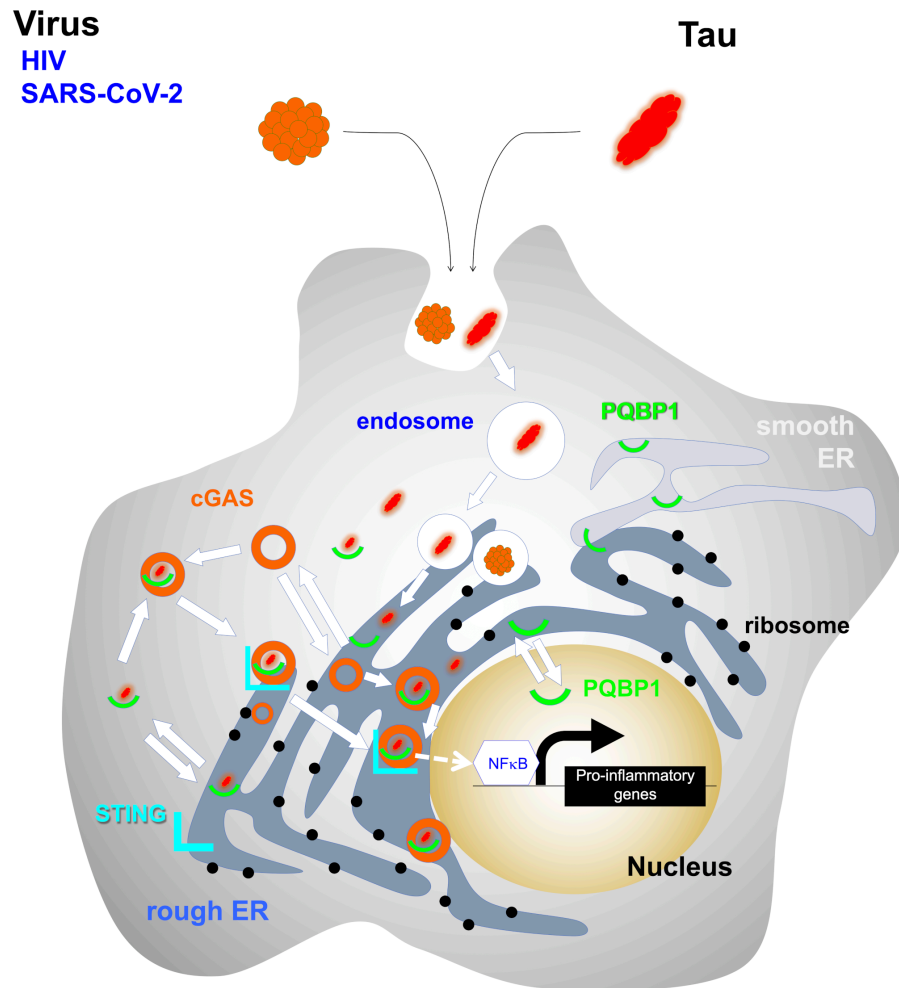

### Supplementary Figure 10

#### Tau sensing by PQBP1-cGAS-STING pathway in microglia

Hypothetical scheme of the results of this study. ER, endoplasmic reticulum; SARS-CoV-2, subacute respiratory syndrome corona virus 2.

## Supplementary Figure 11

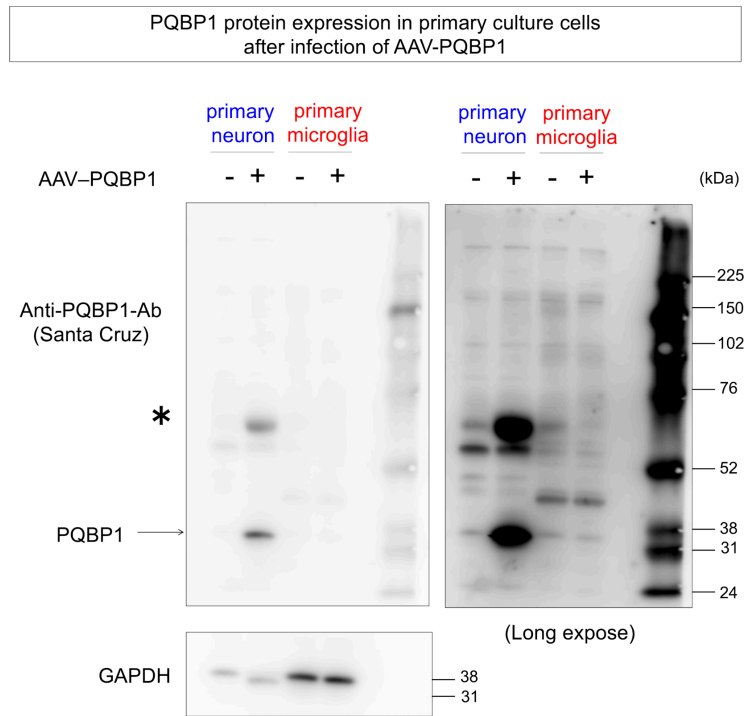

### Supplementary Figure 11

#### AAV-PQBP1 increases PQBP1 in neurons but not in microglia

Cortical neurons and microglia were prepared from mice at E17 and P3, respectively, and were used for infection with AAV-PQBP1 (MOI 5,000). Western blot was performed at 5 days after infection.

## Supplementary Table 1

**K<sub>d</sub> value of SPR in Figure 1b**

|                    | K <sub>d</sub> (M)      |                         |                         |                         |                         |
|--------------------|-------------------------|-------------------------|-------------------------|-------------------------|-------------------------|
|                    | Tau 410                 | Tau 441                 | Tau 410<br>P179A        | Tau 410<br>P216A        | Tau 410<br>P179A/P216A  |
| PQBP1<br>(1-265)   | 4.33 x 10 <sup>-8</sup> | 1.22 x 10 <sup>-8</sup> | 4.82 x 10 <sup>-6</sup> | 3.14 x 10 <sup>-7</sup> | 2.60 x 10 <sup>-5</sup> |
| PQBP1<br>(1-94)    | 7.69 x 10 <sup>-8</sup> | 1.10 x 10 <sup>-8</sup> | 6.34 x 10 <sup>-6</sup> | 4.45 x 10 <sup>-7</sup> | 7.33 x 10 <sup>-5</sup> |
| PQBP1<br>(94-176)  | NB                      | NB                      | NB                      | NB                      | NB                      |
| PQBP1<br>(193-265) | NB                      | NB                      | NB                      | NB                      | NB                      |

## Supplementary Table 2

**K<sub>d</sub> value of SPR in Supplementary Figure 9a**

| K <sub>d</sub> (M) |                         |                         |
|--------------------|-------------------------|-------------------------|
|                    | Tau 441                 | Tau 441 P301S           |
| PQBP1<br>(1-265)   | 4.21 x 10 <sup>-8</sup> | 5.15 x 10 <sup>-8</sup> |
| PQBP1<br>(1-94)    | 5.47 x 10 <sup>-8</sup> | 4.62 x 10 <sup>-8</sup> |
| PQBP1<br>(94-176)  | NB                      | NB                      |
| PQBP1<br>(193-265) | NB                      | NB                      |

### Supplementary Table 3

#### Primer list

| #  | Type        | Primer                            | Sequence (5' - 3')          |
|----|-------------|-----------------------------------|-----------------------------|
| 1  | Mutagenesis | Tau410 P179A_Fw                   | CCCGCGGCTAAAACCCCACCATCCTCT |
| 2  | Mutagenesis | Tau410 P179A_Rev                  | CGGTTTTGCGGAGGGCGCCGATTTTGG |
| 3  | Mutagenesis | Tau410 P216A_Fw                   | AGCCTGGCAACACCACCGACCCGTGAA |
| 4  | Mutagenesis | Tau410 P216A_Rev                  | AGTGCATGAGGCTCGGACCGTTGTGGT |
| 5  | RT-qPCR     | <i>Tnf</i> _Fw                    | TGCTTGTTGACAGCGGTCC         |
| 6  | RT-qPCR     | <i>Tnf</i> _Rev                   | ACTGGCCATCGTGGAGGTAC        |
| 7  | RT-qPCR     | <i>Isg54</i> _Fw                  | AGCAAGATGCACCAAGATGA        |
| 8  | RT-qPCR     | <i>Isg54</i> _Rev                 | CTGTGTCAAAGCGCTCAAAG        |
| 9  | RT-qPCR     | <i>Ifn<math>\beta</math></i> _Fw  | GCCTTTGCCATCCAAGAGATGC      |
| 10 | RT-qPCR     | <i>Ifn<math>\beta</math></i> _Rev | ACACTGTCTGCTGGTGGAGTTC      |
| 11 | RT-qPCR     | <i>Cxcl10</i> _Fw                 | ATCATCCCTGCGAGCCTATCCT      |
| 12 | RT-qPCR     | <i>Cxcl10</i> _Rev                | GACCTTTTTTGGCTAAACGCTTTC    |
| 13 | RT-qPCR     | <i>Gapdh</i> _Fw                  | TGAACGGGAAGCTCACTGG         |
| 14 | RT-qPCR     | <i>Gapdh</i> _Rev                 | TCCACCACCCTGTTGCTGTA        |



## Supplementary Table 4

### List of antibodies

| #  | Antibody                        | Company & catalog number            | Dilution                               | Manufacturer's website                                                                                                                                                                                                  |
|----|---------------------------------|-------------------------------------|----------------------------------------|-------------------------------------------------------------------------------------------------------------------------------------------------------------------------------------------------------------------------|
| 1  | rabbit anti-PQBP1 FL265         | Santa Cruz Biotechnology, sc-32910  | Quantitative IP 1:80<br>ICC 1:250      | <a href="https://datasheets.scbt.com/sds/aghs/en/sc-32910.pdf#">https://datasheets.scbt.com/sds/aghs/en/sc-32910.pdf#</a>                                                                                               |
| 2  | rabbit anti-PQBP1               | Bethyl, A302-801A                   | IP/IHC 1:200<br>ICC 1:150<br>WB 1:1000 | <a href="https://www.bethyl.com/product/A302-801A/PQBP1+Antibody">https://www.bethyl.com/product/A302-801A/PQBP1+Antibody</a>                                                                                           |
| 3  | mouse anti-PQBP1                | Santa Cruz Biotechnology,sc-374260  | ICC/IHC 1:200                          | <a href="https://datasheets.scbt.com/sc-374260.pdf">https://datasheets.scbt.com/sc-374260.pdf</a>                                                                                                                       |
| 4  | mouse anti-Tau                  | Merck, MAB361                       | Quantitative IP 1:400<br>WB 1:3000     | <a href="https://www.sigmaaldrich.com/JP/ja/product/mm/mab361">https://www.sigmaaldrich.com/JP/ja/product/mm/mab361</a>                                                                                                 |
| 5  | mouse anti-Tau                  | Abcam, ab80579                      | IP 1:200<br>WB 1:10,000                | <a href="https://www.abcam.com/tau-antibody-tau-5-bsa-and-azide-free-ab80579.html">https://www.abcam.com/tau-antibody-tau-5-bsa-and-azide-free-ab80579.html</a>                                                         |
| 6  | mouse anti-tau                  | Thermo Fisher Scientific, MA5-15108 | IHC 1:500                              | <a href="https://www.thermofisher.com/antibody/product/Tau-Antibody-clone-S-125-0-Monoclonal/MA5-15108">https://www.thermofisher.com/antibody/product/Tau-Antibody-clone-S-125-0-Monoclonal/MA5-15108</a>               |
| 7  | mouse anti-phospho-tau(AT-8)    | Innogenetics, 90206                 | ICC/IHC 1:1000                         | <a href="https://search.cosmobio.co.jp/cosmo_search_p/search_gate2/docs/IGT_/90206.20190605.pdf">https://search.cosmobio.co.jp/cosmo_search_p/search_gate2/docs/IGT_/90206.20190605.pdf</a>                             |
| 8  | rabbit anti-Iba1                | WAKO, 019-19741                     | ICC/IHC 1:1000                         | <a href="https://labchem-wako.fujifilm.com/us/product/detail/W01W0101-1974.html">https://labchem-wako.fujifilm.com/us/product/detail/W01W0101-1974.html</a>                                                             |
| 9  | goat anti-Iba1                  | WAKO, 011-27991                     | IHC 1:500                              | <a href="https://labchem-wako.fujifilm.com/us/product/detail/W01W0101-2799.html">https://labchem-wako.fujifilm.com/us/product/detail/W01W0101-2799.html</a>                                                             |
| 10 | goat anti-Iba1                  | Abcam,ab107159                      | IHC 1:500                              | <a href="https://www.abcam.com/iba1-antibody-ab107159.html">https://www.abcam.com/iba1-antibody-ab107159.html</a>                                                                                                       |
| 11 | human IgG                       | Thermo Fisher Scientific,12000C     | Quantitative IP 1:400                  | <a href="https://www.thermofisher.com/antibody/product/Human-IgG-Isotype-Control/12000C">https://www.thermofisher.com/antibody/product/Human-IgG-Isotype-Control/12000C</a>                                             |
| 12 | anti-cGAS rabbit antibody       | Merck, ABF124                       | ICC/IHC 1:500<br>WB 1:1000             | <a href="https://www.merckmillipore.com/JP/en/product/Anti-cGAS-Antibody_MM_NF-ABF124">https://www.merckmillipore.com/JP/en/product/Anti-cGAS-Antibody_MM_NF-ABF124</a>                                                 |
| 13 | mouse anti-TREM2                | Santa Cruz Biotechnology, sc-373828 | ICC 1:100                              | <a href="https://datasheets.scbt.com/sc-373828.pdf">https://datasheets.scbt.com/sc-373828.pdf</a>                                                                                                                       |
| 14 | mouse anti-LRP1 antibody        | Santa Cruz Biotechnology, sc-57353  | ICC 1:250                              | <a href="https://datasheets.scbt.com/sc-57353.pdf">https://datasheets.scbt.com/sc-57353.pdf</a>                                                                                                                         |
| 15 | rabbit anti-NFκB p65 (C-20)     | Santa Cruz Biotechnology, sc-372    | ICC/IHC 1:250                          | <a href="https://datasheets.scbt.com/sc-372.pdf">https://datasheets.scbt.com/sc-372.pdf</a>                                                                                                                             |
| 16 | mouse anti-LPL                  | Abcam, ab21356                      | IHC 1:100                              | <a href="https://www.abcam.com/lipoprotein-lipase-antibody-lpla4-ab21356.html">https://www.abcam.com/lipoprotein-lipase-antibody-lpla4-ab21356.html</a>                                                                 |
| 17 | rabbit anti-MAP2                | Abcam, ab32454                      | IHC 1:1000                             | <a href="https://www.abcam.com/map2-antibody-neuronal-marker-ab32454.html">https://www.abcam.com/map2-antibody-neuronal-marker-ab32454.html</a>                                                                         |
| 18 | mouse anti-GFAP-Cy3             | Sigma aldrich, C9205                | IHC 1:5000                             | <a href="https://www.sigmaaldrich.com/JP/ja/product/sigma/c9205?context=product">https://www.sigmaaldrich.com/JP/ja/product/sigma/c9205?context=product</a>                                                             |
| 19 | mouse anti-NeuN                 | Abcam, ab104224                     | IHC 1:1000                             | <a href="https://www.abcam.com/neun-antibody-1b7-neuronal-marker-ab104224.html">https://www.abcam.com/neun-antibody-1b7-neuronal-marker-ab104224.html</a>                                                               |
| 20 | Biotin-16-dUTP                  | Roche, 11093070910                  | IHC 1:100                              | <a href="http://www.qcbio.com/roche/Biotin-16-dUTP.asp">http://www.qcbio.com/roche/Biotin-16-dUTP.asp</a>                                                                                                               |
| 21 | Terminal Transferase            | Roche, 03333574001                  | IHC 1:100                              | <a href="https://custombiotech.roche.com/home/Product_Details/3_6_14_3_7_2.html">https://custombiotech.roche.com/home/Product_Details/3_6_14_3_7_2.html</a>                                                             |
| 22 | rabbit anti-STING               | Cell Signaling Technology, 13647S   | WB 1:3000                              | <a href="https://www.cellsignal.com/products/primary-antibodies/sting-d2p2f-rabbit-mab/13647">https://www.cellsignal.com/products/primary-antibodies/sting-d2p2f-rabbit-mab/13647</a>                                   |
| 23 | rabbit anti-phospho-Ser536-NFκB | Cell Signaling Technology, 3033S    | WB 1:1000                              | <a href="https://www.cellsignal.com/products/primary-antibodies/phospho-nf-kb-p65-ser536-93h1-rabbit-mab/3033">https://www.cellsignal.com/products/primary-antibodies/phospho-nf-kb-p65-ser536-93h1-rabbit-mab/3033</a> |
| 24 | rabbit anti-phospho-Ser396-IRF3 | Cell Signaling Technology, 4947S    | WB 1:1000                              | <a href="https://www.cellsignal.com/products/primary-antibodies/phospho-irf-3-ser396-4d4g-rabbit-mab/4947">https://www.cellsignal.com/products/primary-antibodies/phospho-irf-3-ser396-4d4g-rabbit-mab/4947</a>         |
| 25 | mouse anti-GAPDH                | Millipore, MAB374                   | WB 1:5000                              | <a href="https://www.sigmaaldrich.com/JP/ja/product/MM/MAB374">https://www.sigmaaldrich.com/JP/ja/product/MM/MAB374</a>                                                                                                 |

## Supplementary Table 5

### Mouse information

| # | Strain                                                                                                           | Age      | Sex  | Related Figure                                                                                    |
|---|------------------------------------------------------------------------------------------------------------------|----------|------|---------------------------------------------------------------------------------------------------|
| 1 | <i>Pqbp1</i> -cKO: <i>Cx3cr1</i> <sup>CreER/CreER</sup> / <i>Pqbp1</i> <sup>floxXY</sup><br>(C57BL/6 background) | 8 weeks  | male | Figure 6b,c,d; Figure 7c,d,e,f; Figure 9a,b; Figure 10a;<br>Supplementary Figure 5,6,7,8,9g,9h,9i |
| 2 | B6.129P2(Cg)- <i>Cx3cr1</i> <sup>tm1Litt</sup> /J ( <i>Cx3cr1</i> <sup>GFP</sup> )                               | 8 weeks  | male | Figure 6e,f                                                                                       |
| 3 | R6/2                                                                                                             | 12 weeks | male | Supplementary Figure 2                                                                            |
